# Supplementary material
Source: bioRxiv or medRxiv preprint supplement (https://www.biorxiv.org/content/biorxiv/early/2021/06/29/2020.10.23.352286/DC1/embed/media-1.pdf)
Supplement: Supplementary file [file media-1.pdf]

## Supplementary information

**Supplementary table S1:** Proportions of the most frequent five topologies based on window sizes. NA - not in the five most frequent for that window size. Whitesided - Pacific white-sided dolphin, Pilotwhale - long-finned pilot whale, IndoBottlenose - Indo-Pacific bottlenose dolphin, Bottlenose - bottlenose dolphin, Killerwhale - killer whale, Beluga - beluga, Narwhal - narwhal, Harbour - harbour porpoise, Finless - finless porpoise, Baiji - Baiji (outgroup).

| 50 kb | 100 kb | 500 kb | 1 Mb | Topology                                                                                                              |
|-------|--------|--------|------|-----------------------------------------------------------------------------------------------------------------------|
| 0.24  | 0.32   | 0.64   | 0.79 | (((((Whitesided,(Pilotwhale,(IndoBottlenose,Bottlenose))),Killerwhale)),((Beluga,Narwhal),(Harbour,Finless))),Baiji); |
| 0.14  | 0.14   | 0.09   | 0.05 | (((((Pilotwhale,(IndoBottlenose,Bottlenose)),(Whitesided,Killerwhale)),((Beluga,Narwhal),(Harbour,Finless))),Baiji);  |
| 0.13  | 0.14   | 0.14   | 0.10 | (((((Pilotwhale,(Whitesided,(IndoBottlenose,Bottlenose))),Killerwhale)),((Beluga,Narwhal),(Harbour,Finless))),Baiji); |
| 0.09  | 0.08   | 0.04   | 0.02 | (((((Pilotwhale,Whitesided),(IndoBottlenose,Bottlenose)),Killerwhale)),((Beluga,Narwhal),(Harbour,Finless))),Baiji);  |
| 0.08  | NA     | NA     | NA   | (((((Killerwhale,(Pilotwhale,(IndoBottlenose,Bottlenose))),Whitesided)),((Beluga,Narwhal),(Harbour,Finless))),Baiji); |
| NA    | 0.07   | 0.03   | 0.02 | ((((Whitesided,((Pilotwhale,(IndoBottlenose,Bottlenose))),Killerwhale)),((Beluga,Narwhal),(Harbour,Finless))),Baiji); |
| 0.69  | 0.76   | 0.94   | 0.98 | Top 5 topologies combined                                                                                             |

**Supplementary table S2:** Proportions of the most frequent five topologies based on GC content and a window size of 50 kb. NA - not in the five most frequent for that window size. Whitesided - Pacific white-sided dolphin, Pilotwhale - long-finned pilot whale, IndoBottlenose - Indo-Pacific bottlenose dolphin, Bottlenose - bottlenose dolphin, Killerwhale - killer whale, Beluga - beluga, Narwhal - narwhal, Harbour - harbour porpoise, Finless - finless porpoise, Baiji - Baiji (outgroup).

| Low GC | Medium GC | High GC | Topology                                                                                                              |
|--------|-----------|---------|-----------------------------------------------------------------------------------------------------------------------|
| 2814   | 3395      | 4227    | ((((Killerwhale,(Whitesided,((IndoBottlenose,Bottlenose),Pilotwhale))),((Beluga,Narwhal),(Harbour,Finless))),Baiji);  |
| 2023   | 2107      | 2085    | (((((Pilotwhale,(IndoBottlenose,Bottlenose)),(Whitesided,Killerwhale)),((Beluga,Narwhal),(Harbour,Finless))),Baiji);  |
| 1740   | 1898      | 1976    | (((((Pilotwhale,(Whitesided,(IndoBottlenose,Bottlenose))),Killerwhale)),((Beluga,Narwhal),(Harbour,Finless))),Baiji); |
| 1287   | 1289      | 1317    | (((((Pilotwhale,Whitesided),(IndoBottlenose,Bottlenose)),Killerwhale)),((Beluga,Narwhal),(Harbour,Finless))),Baiji);  |
| 1152   | NA        | NA      | (((((Whitesided,(IndoBottlenose,Bottlenose)),(Pilotwhale,Killerwhale)),((Beluga,Narwhal),(Harbour,Finless))),Baiji);  |
| NA     | 1190      | 1149    | ((((Whitesided,((Pilotwhale,(IndoBottlenose,Bottlenose))),Killerwhale)),((Beluga,Narwhal),(Harbour,Finless))),Baiji); |

**Supplementary table S3:** QuIBL results when using every twentieth tree from the 50 kb sliding window analysis - attached as spreadsheet.

**Supplementary table S4:** QuIBL results from trees constructed using 20 kb windows with a 1 Mb slide - attached as spreadsheet.

**Supplementary table S5:** D-statistics results for all triplet combinations phylogenetically concurrent with our results shown in Figure 1. Baiji was used as the outgroup/ancestral sequence. A non-significant result ( $|Z| < 3$ ) is indicated in bold. Colours indicate the family of the given individual. Red = Delphinidae, yellow = Phocoenidae, blue = Monodontidae.

| H1           | H2             | H3               | nABBA     | nBABA     | D-score | Z-score |
|--------------|----------------|------------------|-----------|-----------|---------|---------|
| Bottlenose   | IndoBottlenose | Killer whale     | 597,251   | 554,780   | 0.037   | 23.26   |
| Bottlenose   | IndoBottlenose | Pilotwhale       | 748,948   | 691,844   | 0.040   | 24.13   |
| Bottlenose   | IndoBottlenose | Whitesided       | 721,498   | 665,420   | 0.040   | 25.20   |
| Pilotwhale   | Whitesided     | Killer whale     | 2,224,888 | 2,119,068 | 0.024   | 11.77   |
| Pilotwhale   | Bottlenose     | Killer whale     | 1,998,297 | 1,795,444 | 0.053   | 26.15   |
| Pilotwhale   | IndoBottlenose | Killer whale     | 2,004,478 | 1,757,429 | 0.066   | 31.95   |
| Pilotwhale   | Bottlenose     | Whitesided       | 2,490,189 | 2,051,579 | 0.097   | 42.67   |
| Pilotwhale   | IndoBottlenose | Whitesided       | 2,508,755 | 2,007,966 | 0.111   | 48.64   |
| Whitesided   | Bottlenose     | Killer whale     | 2,111,742 | 2,014,525 | 0.024   | 11.88   |
| Whitesided   | IndoBottlenose | Killer whale     | 2,117,925 | 1,975,800 | 0.035   | 17.25   |
| Killer whale | Pilotwhale     | Finless          | 928,942   | 840,273   | 0.050   | 51.99   |
| Killer whale | Whitesided     | Finless          | 924,323   | 829,525   | 0.054   | 56.12   |
| Killer whale | Pilotwhale     | Harbour porpoise | 959,748   | 851,885   | 0.060   | 60.74   |
| Killer whale | Whitesided     | Harbour porpoise | 956,686   | 840,318   | 0.065   | 65.46   |
| Killer whale | Bottlenose     | Finless          | 942,684   | 757,495   | 0.109   | 107.12  |
| Killer whale | Bottlenose     | Harbour porpoise | 974,032   | 767,636   | 0.119   | 116.98  |
| Killer whale | IndoBottlenose | Finless          | 943,526   | 728,185   | 0.129   | 120.99  |
| Killer whale | IndoBottlenose | Harbour porpoise | 974,967   | 739,024   | 0.138   | 130.60  |
| Pilotwhale   | Whitesided     | Finless          | 861,276   | 855,083   | 0.004   | 4.41    |
| Pilotwhale   | Whitesided     | Harbour porpoise | 892,930   | 884,620   | 0.005   | 5.64    |
| Pilotwhale   | Bottlenose     | Finless          | 828,193   | 724,397   | 0.067   | 73.75   |
| Pilotwhale   | Bottlenose     | Harbour porpoise | 857,823   | 749,827   | 0.067   | 76.38   |
| Pilotwhale   | IndoBottlenose | Finless          | 829,393   | 692,413   | 0.090   | 97.23   |
| Pilotwhale   | IndoBottlenose | Harbour porpoise | 859,146   | 718,044   | 0.089   | 98.69   |

|                  |                         |                  |                |                |              |             |
|------------------|-------------------------|------------------|----------------|----------------|--------------|-------------|
| Whitesided       | Bottlenose              | Harbour porpoise | 887,876        | 787,914        | 0.060        | 68.88       |
| Whitesided       | Bottlenose              | Finless          | 857,483        | 760,224        | 0.060        | 69.75       |
| Whitesided       | IndoBottlenose          | Harbour porpoise | 888,872        | 755,955        | 0.081        | 92.25       |
| Whitesided       | IndoBottlenose          | Finless          | 858,523        | 727,924        | 0.082        | 92.84       |
| Bottlenose       | IndoBottlenose          | Narwhal          | 414,272        | 380,995        | 0.042        | 33.84       |
| Bottlenose       | IndoBottlenose          | Beluga           | 434,366        | 396,566        | 0.045        | 37.67       |
| Killer whale     | Pilotwhale              | Narwhal          | 955,756        | 837,598        | 0.066        | 61.58       |
| Killer whale     | Pilotwhale              | Beluga           | 984,462        | 854,528        | 0.071        | 65.67       |
| Killer whale     | Whitesided              | Narwhal          | 953,496        | 826,881        | 0.071        | 66.17       |
| Killer whale     | Whitesided              | Beluga           | 982,162        | 844,661        | 0.075        | 67.95       |
| Killer whale     | Bottlenose              | Narwhal          | 971,164        | 751,458        | 0.128        | 111.86      |
| Killer whale     | Bottlenose              | Beluga           | 1,001,546      | 767,422        | 0.132        | 113.69      |
| Killer whale     | IndoBottlenose          | Narwhal          | 974,507        | 722,249        | 0.149        | 126.51      |
| Killer whale     | IndoBottlenose          | Beluga           | 1,007,582      | 736,424        | 0.155        | 128.87      |
| Pilotwhale       | Whitesided              | Beluga           | 918,941        | 911,423        | 0.004        | 4.93        |
| Pilotwhale       | Whitesided              | Narwhal          | 891,298        | 883,114        | 0.005        | 5.61        |
| Pilotwhale       | Bottlenose              | Narwhal          | 859,652        | 743,735        | 0.072        | 78.60       |
| Pilotwhale       | Bottlenose              | Beluga           | 887,196        | 766,562        | 0.073        | 81.55       |
| Pilotwhale       | IndoBottlenose          | Narwhal          | 863,608        | 710,777        | 0.097        | 103.83      |
| Pilotwhale       | IndoBottlenose          | Beluga           | 895,023        | 731,826        | 0.100        | 105.92      |
| Whitesided       | Bottlenose              | Narwhal          | 888,390        | 780,573        | 0.065        | 74.77       |
| Whitesided       | Bottlenose              | Beluga           | 917,400        | 804,237        | 0.066        | 76.44       |
| Whitesided       | IndoBottlenose          | Narwhal          | 892,496        | 747,539        | 0.088        | 97.69       |
| Whitesided       | IndoBottlenose          | Beluga           | 925,091        | 769,228        | 0.092        | 102.86      |
| <b>Finless</b>   | <b>Harbour porpoise</b> | <b>Narwhal</b>   | <b>452,411</b> | <b>450,657</b> | <b>0.002</b> | <b>1.59</b> |
| Harbour porpoise | Finless                 | Beluga           | 570,767        | 552,830        | 0.016        | 13.47       |
| Narwhal          | Beluga                  | Harbour porpoise | 532,605        | 502,660        | 0.029        | 25.72       |
| Narwhal          | Beluga                  | Finless          | 514,273        | 466,273        | 0.049        | 41.75       |
| Finless          | Narwhal                 | Killer whale     | 973,140        | 885,678        | 0.047        | 47.30       |
| Finless          | Narwhal                 | Bottlenose       | 1,077,206      | 966,370        | 0.054        | 55.93       |
| Finless          | Narwhal                 | IndoBottlenose   | 1,080,812      | 970,600        | 0.054        | 56.63       |
| Finless          | Narwhal                 | Pilotwhale       | 1,059,846      | 950,178        | 0.055        | 57.27       |
| Finless          | Beluga                  | Killer whale     | 989,901        | 875,364        | 0.061        | 57.51       |

|                  |         |                |           |         |       |       |
|------------------|---------|----------------|-----------|---------|-------|-------|
| Finless          | Narwhal | Whitesided     | 1,062,632 | 951,040 | 0.055 | 57.94 |
| Finless          | Beluga  | Bottlenose     | 1,103,352 | 951,967 | 0.074 | 68.54 |
| Finless          | Beluga  | Pilotwhale     | 1,084,679 | 936,511 | 0.073 | 68.84 |
| Finless          | Beluga  | IndoBottlenose | 1,109,158 | 955,589 | 0.074 | 69.72 |
| Finless          | Beluga  | Whitesided     | 1,087,277 | 938,148 | 0.074 | 69.88 |
| Harbour porpoise | Narwhal | Killer whale   | 1,004,793 | 891,909 | 0.060 | 59.43 |
| Harbour porpoise | Beluga  | Killer whale   | 1,028,676 | 885,849 | 0.075 | 69.85 |
| Harbour porpoise | Narwhal | Pilotwhale     | 1,124,641 | 974,232 | 0.072 | 75.43 |
| Harbour porpoise | Narwhal | Bottlenose     | 1,145,470 | 990,640 | 0.072 | 75.66 |
| Harbour porpoise | Narwhal | Whitesided     | 1,127,578 | 976,951 | 0.072 | 75.84 |
| Harbour porpoise | Narwhal | IndoBottlenose | 1,153,263 | 994,022 | 0.074 | 78.93 |
| Harbour porpoise | Beluga  | Pilotwhale     | 1,163,136 | 965,266 | 0.093 | 88.73 |
| Harbour porpoise | Beluga  | Whitesided     | 1,165,862 | 968,086 | 0.093 | 89.42 |
| Harbour porpoise | Beluga  | Bottlenose     | 1,185,612 | 981,030 | 0.094 | 89.66 |
| Harbour porpoise | Beluga  | IndoBottlenose | 1,197,547 | 984,311 | 0.098 | 93.10 |

**Supplementary table S6:** 100kb non-overlapping sliding window D-foil results for all quadruplet combinations [[H1,H2][H3,H4]] phylogenetically concurrent with our results shown in figure 1. Baiji was used as the outgroup/ancestral sequence. - attached as a spreadsheet

**Supplementary table S7:** Mapping statistics of each Delphinoidea species used in this study when specifying the reference genome as the baiji assembly.

| Common name                     | Raw read pairs | Mapped reads  | Coverage | Bp-mapped       |
|---------------------------------|----------------|---------------|----------|-----------------|
| Beluga                          | 466,374,135    | 476,814,543   | 31.44    | 69,807,010,359  |
| Bottlenose dolphin              | 578,690,171    | 732,418,659   | 47.61    | 105,524,983,813 |
| Harbour porpoise                | 289,063,910    | 418,431,029   | 23.17    | 50,830,083,145  |
| Indo-Pacific bottlenose dolphin | 466,306,082    | 551,837,703   | 35.62    | 78,749,625,267  |
| Indo-Pacific finless porpoise   | 523,612,238    | 557,766,873   | 24.96    | 54,450,935,944  |
| Killer whale                    | 1,467,089,287  | 1,047,260,000 | 39.53    | 88,692,400,000  |
| Long-finned pilot whale         | 428,064,233    | 504,482,080   | 28.61    | 63,276,638,573  |
| Narwhal                         | 384,563,392    | 468,429,237   | 31.09    | 68,247,058,370  |
| Pacific white-sided dolphin     | 453,348,710    | 499,704,592   | 28.83    | 63,800,396,300  |

**Supplementary table S8:** Mapping statistics of each Delphinoidea species used in this study when specifying the reference genome as a conspecific assembly.

| Common name                     | Raw read pairs | Mapped reads  | Coverage | Bp-mapped       |
|---------------------------------|----------------|---------------|----------|-----------------|
| Beluga                          | 466,374,135    | 531,535,936   | 34.47    | 79,218,898,913  |
| Bottlenose dolphin              | 578,690,171    | 779,210,277   | 54.03    | 114,530,169,747 |
| Harbour porpoise                | 289,063,910    | 431,762,883   | 23.74    | 52,067,455,809  |
| Indo-Pacific bottlenose dolphin | 466,306,082    | 587,440,922   | 37.88    | 85,032,333,848  |
| Indo-Pacific finless porpoise   | 523,612,238    | 620,580,505   | 27.33    | 61,286,732,910  |
| Killer whale                    | 1,467,089,287  | 1,213,221,913 | 44.93    | 100,903,316,971 |
| Long-finned pilot whale         | 428,064,233    | 598,612,204   | 32.79    | 75,639,560,432  |
| Narwhal                         | 384,563,392    | 529,082,769   | 33.85    | 78,238,763,386  |
| Pacific white-sided dolphin     | 453,348,710    | 592,814,373   | 33.02    | 76,299,243,217  |

**Supplementary table S9:** Genome-wide pairwise distance matrix of the nine Delphinoidea included in this study. Bottlenose = bottlenose dolphin, Finless = finless porpoise, Harbour = harbour porpoise, Indobottle = Indo-Pacific bottlenose dolphin, Killer = killer whale, Pilot = pilot whale, White = Pacific white-sided dolphin.

|            |        |        |        |        |        |        |        |        |        |
|------------|--------|--------|--------|--------|--------|--------|--------|--------|--------|
| Beluga     | 0.0000 | 0.0211 | 0.0151 | 0.0153 | 0.0211 | 0.0205 | 0.0056 | 0.0210 | 0.0209 |
| Bottlenose | 0.0211 | 0.0000 | 0.0230 | 0.0231 | 0.0040 | 0.0113 | 0.0210 | 0.0102 | 0.0107 |
| Finless    | 0.0151 | 0.0230 | 0.0000 | 0.0056 | 0.0230 | 0.0224 | 0.0151 | 0.0229 | 0.0228 |
| Harbour    | 0.0153 | 0.0231 | 0.0056 | 0.0000 | 0.0231 | 0.0225 | 0.0152 | 0.0231 | 0.0230 |
| Indobottle | 0.0211 | 0.0040 | 0.0230 | 0.0231 | 0.0000 | 0.0113 | 0.0210 | 0.0102 | 0.0107 |
| Killer     | 0.0205 | 0.0113 | 0.0224 | 0.0225 | 0.0113 | 0.0000 | 0.0204 | 0.0113 | 0.0112 |
| Narwhal    | 0.0056 | 0.0210 | 0.0151 | 0.0152 | 0.0210 | 0.0204 | 0.0000 | 0.0209 | 0.0208 |
| Pilot      | 0.0210 | 0.0102 | 0.0229 | 0.0231 | 0.0102 | 0.0113 | 0.0209 | 0.0000 | 0.0109 |
| White      | 0.0209 | 0.0107 | 0.0228 | 0.0230 | 0.0107 | 0.0112 | 0.0208 | 0.0109 | 0.0000 |

**Supplementary table S10:** Metrics used to calculate the mutation rate per year with the equation mutation rate = divergence time / 2x genetic distance. Mean divergences were taken from the full dataset 10-partition AR from McGowen et al 2020 (McGowen et al., 2020) and average genetic distances were calculated from the results shown in supplementary table S5.

| Species                     | Closest relative                      | Divergence (Ma) | Distance | Mutation rate per year |
|-----------------------------|---------------------------------------|-----------------|----------|------------------------|
| Beluga                      | Narwhal                               | 7.72            | 0.0056   | $3.63 \times 10^{-10}$ |
| Killer whale                | Delphinidae                           | 10.16           | 0.0113   | $5.56 \times 10^{-10}$ |
| Bottlenose dolphin          | Indo-Pacific bottlenose dolphin       | 2.69            | 0.0040   | $7.51 \times 10^{-10}$ |
| Harbour porpoise            | Finless porpoise                      | 5.36            | 0.0056   | $5.25 \times 10^{-10}$ |
| Long-finned pilot whale     | <i>Tursiops</i> spp.                  | 7.46            | 0.0102   | $6.83 \times 10^{-10}$ |
| Pacific white-sided dolphin | <i>Tursiops</i> + <i>Globicephala</i> | 9.48            | 0.0108   | $5.69 \times 10^{-10}$ |

**Supplementary table S11:** Generation times, generational mutation rates and references for the generation times for each of the nine Delphinoidea species used in this study.

| Common name                     | Generation time | Generational mutation rate | Generation time reference   | Bp-mapped       |
|---------------------------------|-----------------|----------------------------|-----------------------------|-----------------|
| Beluga                          | 32              | $1.16 \times 10^{-8}$      | (Garde et al., 2015)        | 79,218,898,913  |
| Bottlenose dolphin              | 21              | $1.58 \times 10^{-8}$      | (Taylor et al., 2007)       | 114,530,169,747 |
| Harbour porpoise                | 10              | $5.25 \times 10^{-9}$      | (Birkun and Frantzis, 2008) | 52,067,455,809  |
| Indo-Pacific bottlenose dolphin | 21              | $1.58 \times 10^{-8}$      | (Taylor et al., 2007)       | 85,032,333,848  |
| Indo-Pacific finless porpoise   | 8               | $4.20 \times 10^{-9}$      | (Zhou et al., 2018)         | 61,286,732,910  |
| Killer whale                    | 26              | $1.43 \times 10^{-8}$      | (Foote et al., 2016)        | 100,903,316,971 |
| Long-finned pilot whale         | 24              | $1.64 \times 10^{-8}$      | (Taylor et al., 2007)       | 75,639,560,432  |
| Narwhal                         | 30              | $1.09 \times 10^{-8}$      | (Garde et al., 2015)        | 78,238,763,386  |
| Pacific white-sided dolphin     | 21              | $1.21 \times 10^{-8}$      | (Taylor et al., 2007)       | 76,299,243,217  |

**Supplementary table S12:** The pre-divergence  $N_e$ , divergence time intervals, and the increments specified for each of the species pair used for the simulations to compare against the hPSMC results.

| <b>Species pair</b>                                | <b>Pre-divergence<br/><math>N_e</math></b> | <b>Range (Ma)</b> | <b>Increments<br/>(years)</b> |
|----------------------------------------------------|--------------------------------------------|-------------------|-------------------------------|
| Beluga whale + Narwhal                             | 30,000                                     | 1-2               | 100,000                       |
| Beluga whale + Finless porpoise                    | 60,000                                     | 3-7               | 200,000                       |
| Beluga whale + Harbour porpoise                    | 60,000                                     | 3-7               | 200,000                       |
| Narwhal + Finless porpoise                         | 60,000                                     | 3-7               | 200,000                       |
| Narwhal + Harbour porpoise                         | 60,000                                     | 3-7               | 200,000                       |
| Beluga whale + Bottlenose dolphin                  | 105,000                                    | 3.9-8.5           | 200,000                       |
| Beluga whale + Indo-Pacific bottlenose dolphin     | 105,000                                    | 3.9-8.5           | 200,000                       |
| Narwhal + Bottlenose dolphin                       | 105,000                                    | 3.9-8.5           | 200,000                       |
| Narwhal + Indo-Pacific bottlenose dolphin          | 105,000                                    | 3.9-8.5           | 200,000                       |
| Narwhal + Killer whale                             | 105,000                                    | 3.9-8.5           | 200,000                       |
| Narwhal + Long-finned pilot whale                  | 105,000                                    | 3.9-8.5           | 200,000                       |
| Narwhal + Pacific white-sided dolphin              | 105,000                                    | 3.9-8.5           | 200,000                       |
| Beluga whale + Killer whale                        | 105,000                                    | 3.9-8.5           | 200,000                       |
| Beluga whale + Long-finned pilot whale             | 105,000                                    | 3.9-8.5           | 200,000                       |
| Beluga whale + Pacific white-sided dolphin         | 105,000                                    | 3.9-8.5           | 200,000                       |
| Harbour porpoise + Bottlenose dolphin              | 105,000                                    | 3.9-8.5           | 200,000                       |
| Harbour porpoise + Indo-Pacific bottlenose dolphin | 105,000                                    | 3.9-8.5           | 200,000                       |
| Finless porpoise + Bottlenose dolphin              | 105,000                                    | 3.9-8.5           | 200,000                       |
| Finless porpoise + Indo-Pacific bottlenose dolphin | 105,000                                    | 3.9-8.5           | 200,000                       |
| Finless porpoise + Killer whale                    | 105,000                                    | 3.9-8.5           | 200,000                       |
| Finless porpoise + Long-finned pilot whale         | 105,000                                    | 3.9-8.5           | 200,000                       |
| Finless porpoise + Pacific white-sided dolphin     | 105,000                                    | 3.9-8.5           | 200,000                       |
| Harbour porpoise + Killer whale                    | 105,000                                    | 3.9-8.5           | 200,000                       |

|                                                               |         |                 |         |
|---------------------------------------------------------------|---------|-----------------|---------|
| Harbour porpoise + Long-finned pilot whale                    | 105,000 | 3.9-8.5         | 200,000 |
| Harbour porpoise + Pacific white-sided dolphin                | 105,000 | 3.9-8.5         | 200,000 |
| Harbour porpoise + Finless porpoise                           | 40,000  | 0.3-1.4         | 100,000 |
| Indo-Pacific Bottlenose dolphin + Bottlenose dolphin          | 20,000  | 0.2-1.2         | 100,000 |
| Indo-Pacific bottlenose dolphin + Killer whale                | 50,000  | 0.9-2.1 & 3.4-7 | 200,000 |
| Indo-Pacific bottlenose dolphin + Long-finned pilot whale     | 50,000  | 0.9-2.1 & 3.4-7 | 200,000 |
| Indo-Pacific bottlenose dolphin + Pacific white-sided dolphin | 50,000  | 0.9-2.1 & 3.4-7 | 200,000 |
| Bottlenose dolphin + Killer whale                             | 50,000  | 0.9-2.1 & 3.4-7 | 200,000 |
| Bottlenose dolphin + Long-finned pilot whale                  | 50,000  | 0.9-2.1 & 3.4-7 | 200,000 |
| Bottlenose dolphin + Pacific white-sided dolphin              | 50,000  | 0.9-2.1 & 3.4-7 | 200,000 |
| Long-finned pilot whale + Killer whale                        | 60,000  | 0.9-2.1 & 3.4-7 | 200,000 |
| Pacific white-sided dolphin + Killer whale                    | 50,000  | 0.9-2.1 & 3.4-7 | 200,000 |
| Pacific white-sided dolphin + Long-finned pilot whale         | 50,000  | 0.9-2.1 & 3.4-7 | 200,000 |



## Supplementary figures

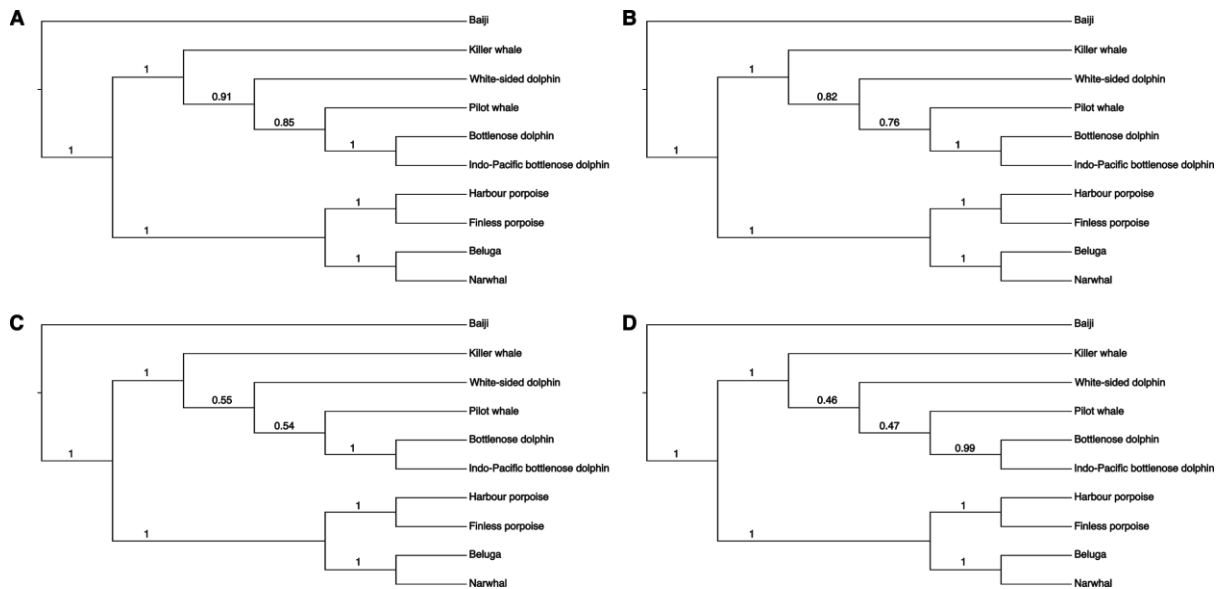

**Supplementary figure S1:** Consensus trees of independent Maximum-Likelihood trees constructed from non-overlapping sliding windows of (A) 1 Mb, (B) 500 kb, (C) 100 kb, or (D) 50 kb in length. Branch numbers represent the number of independent trees supporting each node.

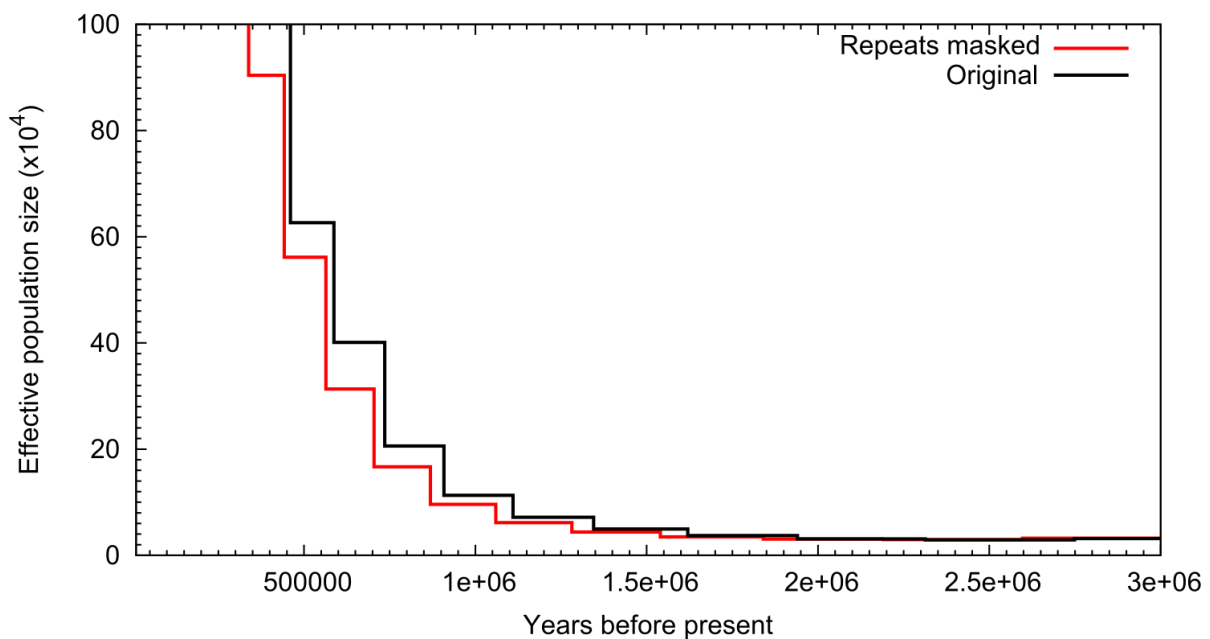

**Supplementary figure S2:** Comparison of hPSMC results using a pseudodiploid sequence from the bottlenose and Indo-Pacific bottlenose dolphins (shallow divergence) with either repeat regions masked or not.

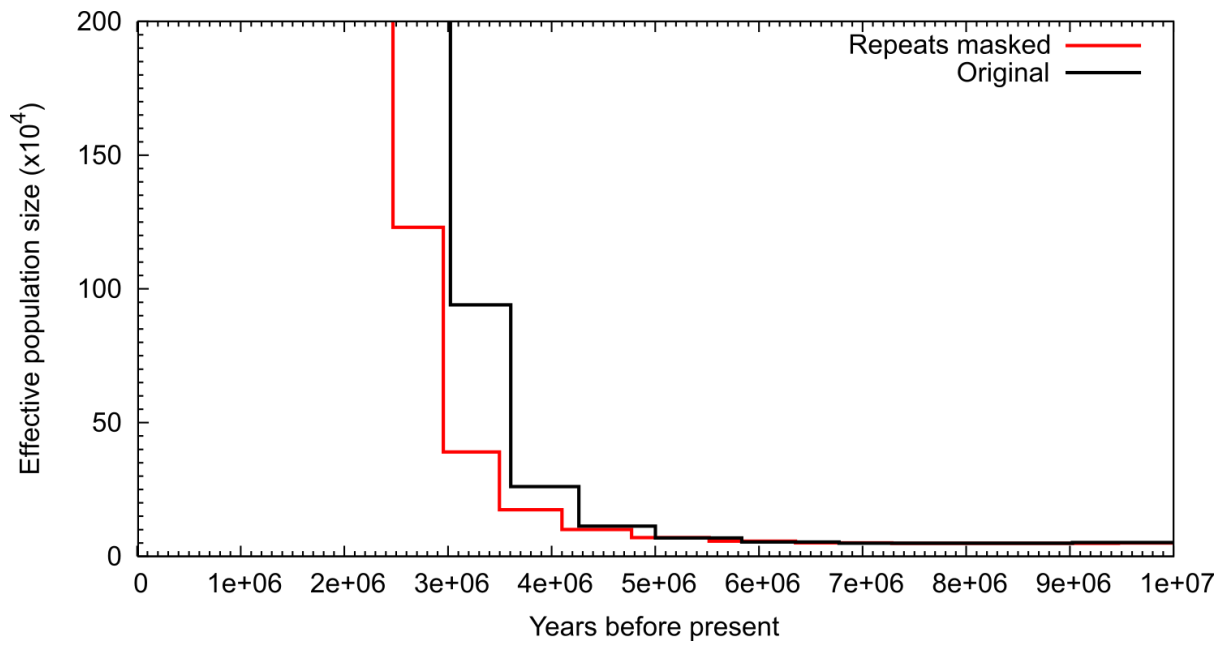

**Supplementary figure S3:** Comparison of hPSMC results using a pseudodiploid sequence from the beluga and narwhal (medium divergence) with either repeat regions masked or not.

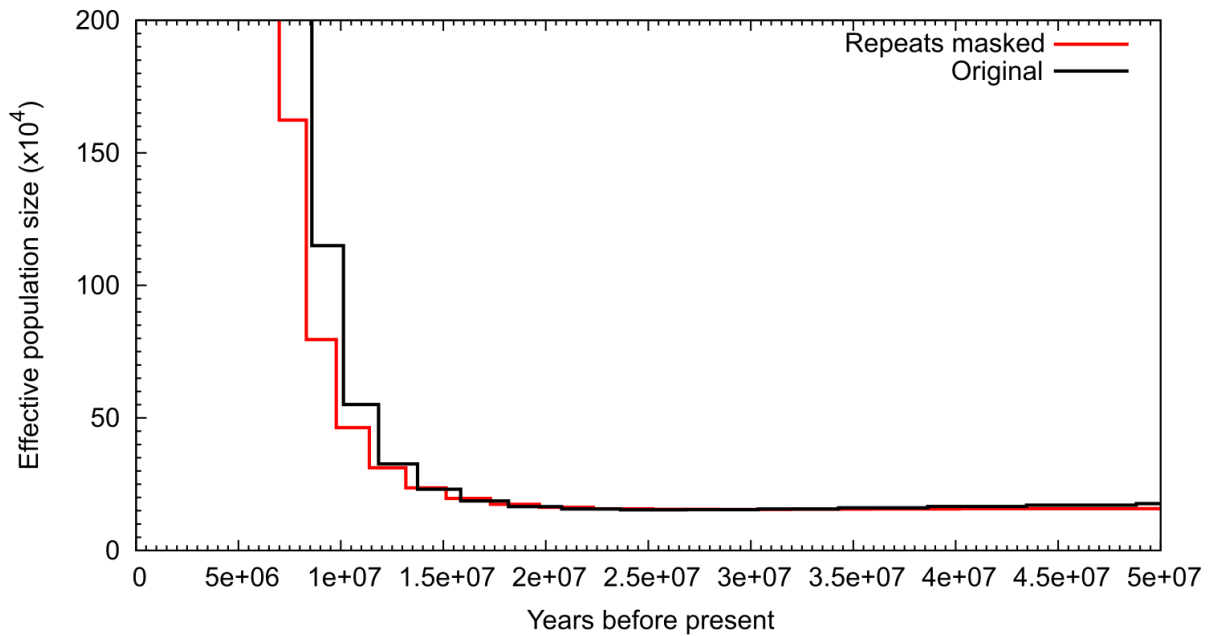

**Supplementary figure S4:** Comparison of hPSMC results using a pseudodiploid sequence from the bottlenose dolphin and beluga (deep divergence) with either repeat regions masked or not.

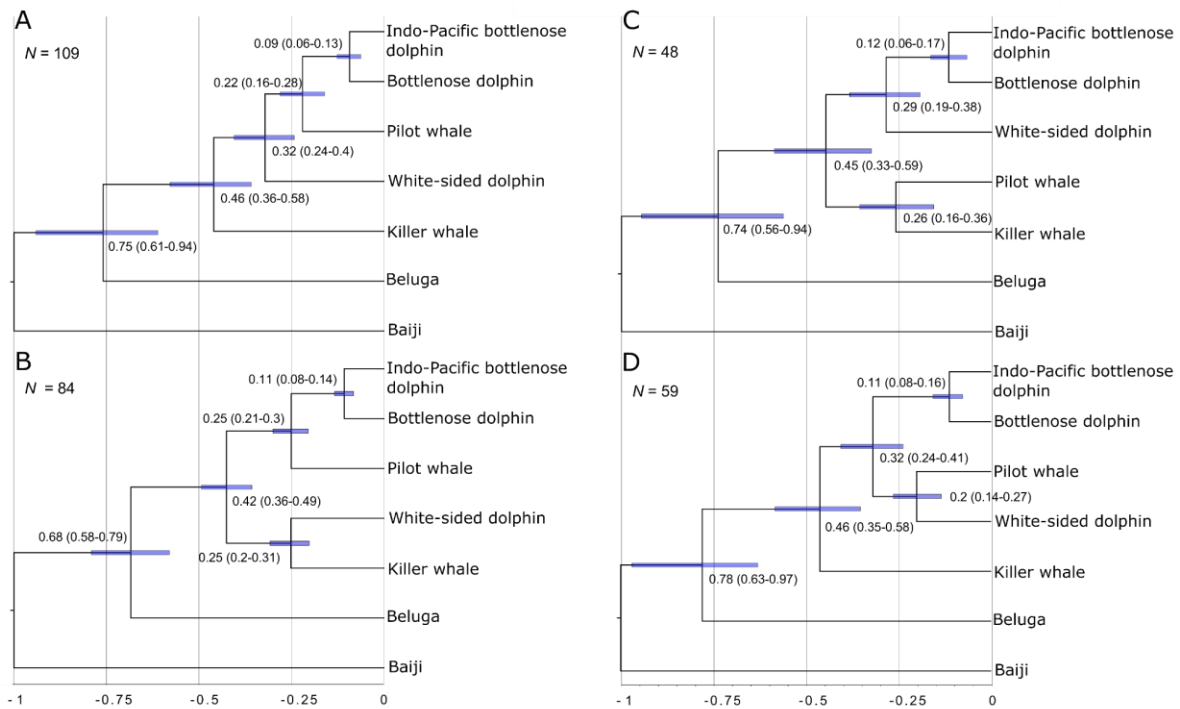

**Supplementary figure S5:** Relative divergence times of alternative topologies assumed to arise due to incomplete lineage sorting (ILS) or gene flow. N represents the number of independent loci supporting said topology. A) Consensus species topology. B) ILS/gene flow between the killer whale and Pacific white-sided dolphin. C) ILS/gene flow between killer whale and long-finned pilot whale. D) ILS/gene flow between Pacific white-sided dolphin and the long-finned pilot whale. Blue bars and numbers in parentheses show 95% credibility intervals.

## Supplementary results

Additional plots of the hPSMC empirical and simulated data can be found under the following link: [https://sid.erda.dk/cgi-sid/lis.py?share\\_id=ewvczfS2hH](https://sid.erda.dk/cgi-sid/lis.py?share_id=ewvczfS2hH) on the University of Copenhagen's electronic research data archive (ERDA). Bold lines show the hPSMC empirical data, faded lines show the simulated data, and the black lines show the simulated data that most closely match the empirical data without overlapping it between 1.5x and 10x the pre-divergence  $N_e$ .

## Supplementary references

- Birkun AA Jr, Frantzis A. 2008. *Phocoena phocoena* ssp. *relicta*. The IUCN Red List of Threatened Species : e.T17027A50369903. <https://dx.doi.org/10.2305/IUCN.UK.2020-2.RLTS.T17027A50369903.en>.
- Footo AD, Vijay N, Ávila-Arcos MC, Baird RW, Durban JW, Fumagalli M, Gibbs RA, Hanson MB, Korneliussen TS, Martin MD, Robertson KM, Sousa VC, Vieira FG, Vinař T, Wade P, Worley KC, Excoffier L, Morin PA, Gilbert MTP, Wolf JBW. 2016. Genome-culture coevolution promotes rapid divergence of killer whale ecotypes. *Nat Commun* **7**:11693.
- Garde E, Hansen SH, Ditlevsen S, Tvermosegaard KB, Hansen J, Harding KC, Heide-Jørgensen MP. 2015. Life history parameters of narwhals (*Monodon monoceros*) from Greenland. *J Mammal* **96**:866–879.
- McGowen MR, Tsagkogeorga G, Álvarez-Carretero S, Dos Reis M, Struebig M, Deaville R, Jepson PD, Jarman S, Polanowski A, Morin PA, Rossiter SJ. 2020. Phylogenomic Resolution of the Cetacean Tree of Life Using Target Sequence Capture. *Syst Biol* **69**:479–501.
- Taylor BL, Chivers SJ, Larese J, Perrin WF. 2007. Generation length and percent mature estimates for IUCN assessments of cetaceans (No. Administrative Report LJ-07-01 ). National Marine Fisheries Service, Southwest Fisheries Science Center.
- Zhou X, Guang X, Sun D, Xu S, Li M, Seim I, Jie W, Yang L, Zhu Q, Xu J, Gao Q, Kaya A, Dou Q, Chen B, Ren W, Li S, Zhou K, Gladyshev VN, Nielsen R, Fang X, Yang G. 2018. Population genomics of finless porpoises reveal an incipient cetacean species adapted to freshwater. *Nat Commun* **9**:1276.
